# Supplementary material for: Development of a flexible and stretchable tactile sensor array with two different structures for robotic hand application
Source: Royal Society of Chemistry journal article supplement (doi:10.1039/c7ra08605a), 2017-01-01
Supplement: c7ra08605a1.pdf [file c7ra08605a1.pdf]

## Supplementary information

### Development of flexible and stretchable tactile sensor array with two different structures for robotic hand application

Xiaozhi Wang<sup>1</sup>, Tianbai Xu<sup>1</sup>, Shurong Dong<sup>1</sup>, Shijian Li<sup>2\*</sup>, Liyang Yu<sup>3</sup>, Wei Guo<sup>1</sup>, Hao Jin<sup>1</sup>, Jikui Luo<sup>3,4</sup>, Zhaohui Wu<sup>2</sup>, Jong Min King<sup>5</sup>

1. Key Laboratory of Micro-nano Electronic Devices and Smart Systems of Zhejiang Province, College of Information Science & Electronic Engineering, Zhejiang University, Hangzhou 310027, China;
2. College of Computer Science, Zhejiang University, Hangzhou 310027, China;
3. College of Electron Infor., Hangzhou Dianzi University, Hangzhou 310018, China.
4. Inst. of Renew. Energ. & Environ. Technol., University of Bolton, Deane Road, Bolton BL3 5AB, United Kingdom

#### 1. PCB testing circuits

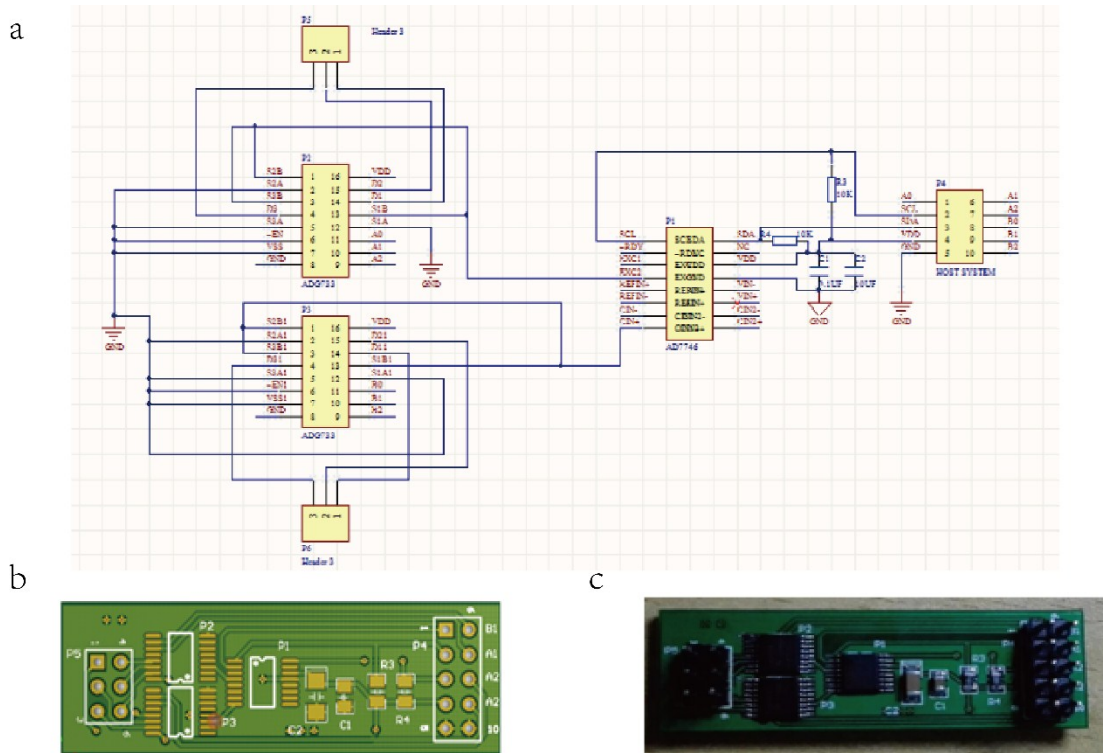

**Figure S1.** Schematic of the circuit (a) for sensor capacitance measurement and its layout (b) and (c).

#### 2. MCU development PCB board (a) and testing system

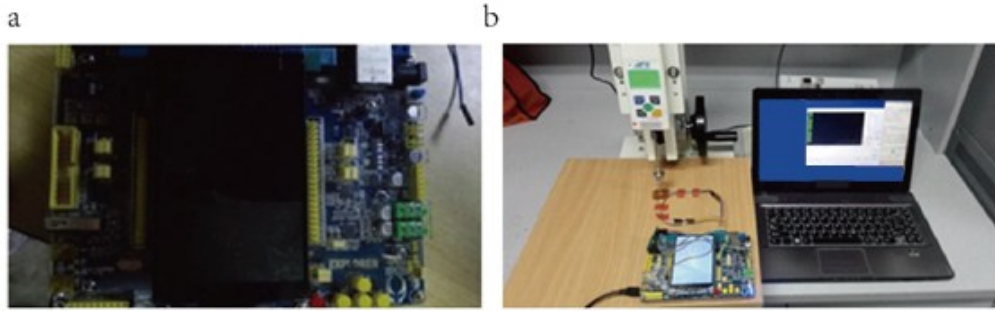

**Figure S2.** STM32F4 MCU development PCB board (a) and testing system (b).
